# Supplementary material for: Pregnenolone sulphate-independent inhibition of TRPM3 channels by progesterone
Source: PubMed Central journal article supplement (PMC3275754; doi:10.1016/j.ceca.2011.09.005), 2012-01
Supplement: mmc1.pdf [file mmc1.pdf]

SUPPLEMENTARY INFORMATION**Pregnenolone sulphate-independent inhibition of TRPM3 channels by progesterone**

Yasser Majeed<sup>1,2</sup>, Sarka Tumova<sup>1,2</sup>, Ben L Green<sup>1,2</sup>, Victoria AL Seymour<sup>1,2</sup>, Daniel M Woods<sup>1,2</sup>, Anil K Agarwal<sup>4</sup>, Jacqueline Naylor<sup>1,2</sup>, Shannon Jiang<sup>1,2</sup>, Helen M Picton<sup>1,3</sup>, Karen E Porter<sup>1,3</sup>, David J O'Regan<sup>5</sup>, Katsuhiko Muraki<sup>2,6</sup>, Colin WG Fishwick<sup>4</sup> & David J Beech<sup>1,2\*</sup>

<sup>1</sup>Multidisciplinary Cardiovascular Research Centre and <sup>2</sup>Institute of Membrane & Systems Biology, Faculty of Biological Sciences and <sup>3</sup>Leeds Institute of Genetics, Health and Therapeutics, Faculty of Medicine & Health, University of Leeds, Leeds, LS2 9JT, UK. <sup>4</sup>School of Chemistry, University of Leeds, Leeds, LS2 9JT. <sup>5</sup>Department of Cardiac Surgery, Leeds General Infirmary, Great George Street, Leeds, LS1 3EX, UK. <sup>6</sup>School of Pharmacy, Aichi-Gakuin University, 1-100 Kusumoto, Chikusa, Nagoya 464-8650, Japan.

\*author for correspondence: Professor David J Beech, Institute of Membrane & Systems Biology, Garstang Building, Faculty of Biological Sciences, University of Leeds, Leeds, LS2 9JT, England (UK). Tel: +44-(0)-113-343-4323; Fax: +44-(0)-113-343-4228; Email: d.j.beech@leeds.ac.uk

**Supplementary figure legends**

**Supplementary Figure I. PregS-evoked calcium signals in HEK 293 cells depend on exogenous TRPM3 expression.** Mean data from intracellular Ca<sup>2+</sup> measurement experiments comparing responses evoked by 1 μM PregS in cells over expressing TRPM3 (Tet+), control non-induced (Tet-) cells, or wild-type (WT) HEK 293 cells (N/n = 24-36/3). For example traces, see Supplementary Fig. IV.

**Supplementary Figure II. Effects of additional progesterone analogues on TRPM3-mediated Ca<sup>2+</sup>-influx.** Data were generated by intracellular Ca<sup>2+</sup> measurement. Mean normalised data are shown for the effects of 25 μM each of pregnanolone (5β) or allopregnanolone (5α) on Ca<sup>2+</sup> responses to 10 μM PregS (N/n = 9/3 for each).

**Supplementary Figure III. Additional 2-dimensional chemical structures.** Chemical structures of 17-hydroxy progesterone, 21-hydroxy progesterone, pregnanolone, allopregnanolone, 17β-oestradiol, aldosterone, cortisol, and nifedipine.

**Supplementary Figure IV. TRPM3 activity in the absence of an exogenous agonist. a, b.** Data were generated by intracellular Ca<sup>2+</sup> measurement. **a.** Example traces showing the effect of 1 μM PregS in cells over-expressing TRPM3 (Tet+), control (Tet-) cells, or wild-type (WT) HEK 293 cells (N = 8-12). **b.** Mean data comparing basal Ca<sup>2+</sup> levels in the indicated groups (N/n = 24-36/3). **c, d.** Whole-cell voltage-clamp was performed in cells over-expressing TRPM3 (Tet+) or control (Tet-) cells. Statistical comparisons were made between data from these two types of cell. **c.** Mean data for basal currents recorded in cells over-expressing TRPM3 (Tet+) or control (Tet-) cells. **d.** Mean data for the currents stimulated by 100 μM PregS in Tet+ and Tet- cells in the recordings shown in **c** (n = 3).

**Supplementary Figure V. Detection of agonist-independent TRPM3 activity.** Data were generated by intracellular Ca<sup>2+</sup> measurement. **a, b.** Cells were incubated in Ca<sup>2+</sup>-free SBS for 30

min and then  $\text{Ca}^{2+}$  was returned (“add-back”) at 1, 3 or 5 mM in Tet+ (TRPM3) (**a**) or Tet- (control) (**b**) cells (N=4 for each condition).

**Supplementary Figure VI. A-type potassium current in granulosa cells.** Example whole-cell patch-clamp recording of an endogenous potassium current in freshly isolated bovine granulosa cells. The voltage paradigm is depicted in the inset.

**Supplementary Figure VII. PregS potency at room temperature and 37 °C.** Data are from intracellular  $\text{Ca}^{2+}$  measurements in cells over-expressing TRPM3 (Tet+). Concentration-response curves for PregS at room temperature (Room temp., white circles) or at 37 °C (black circles). The fitted Hill equations had  $\text{EC}_{50}$  and slope values of: 1.21  $\mu\text{M}$  and 1.34 (Room temp.), and 1.83  $\mu\text{M}$  and 1.19 (37 °C) (N/n = 9/3 for each).

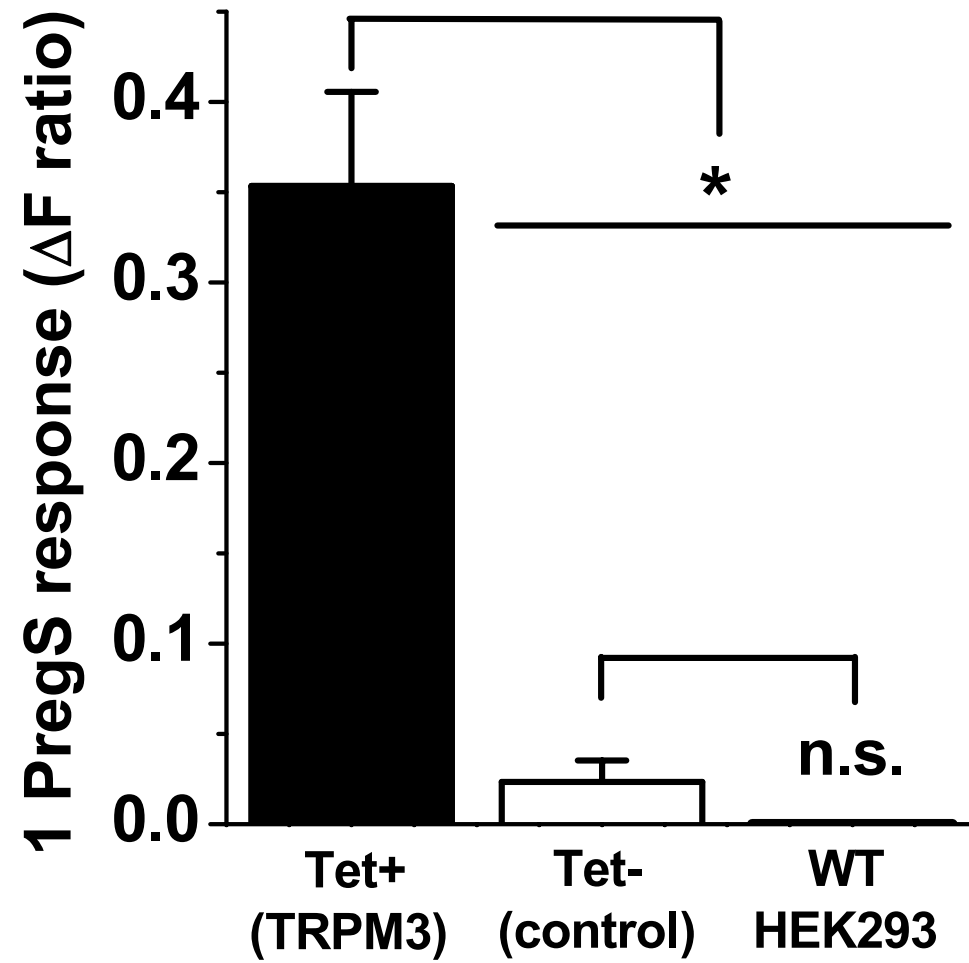

Supplementary figure I

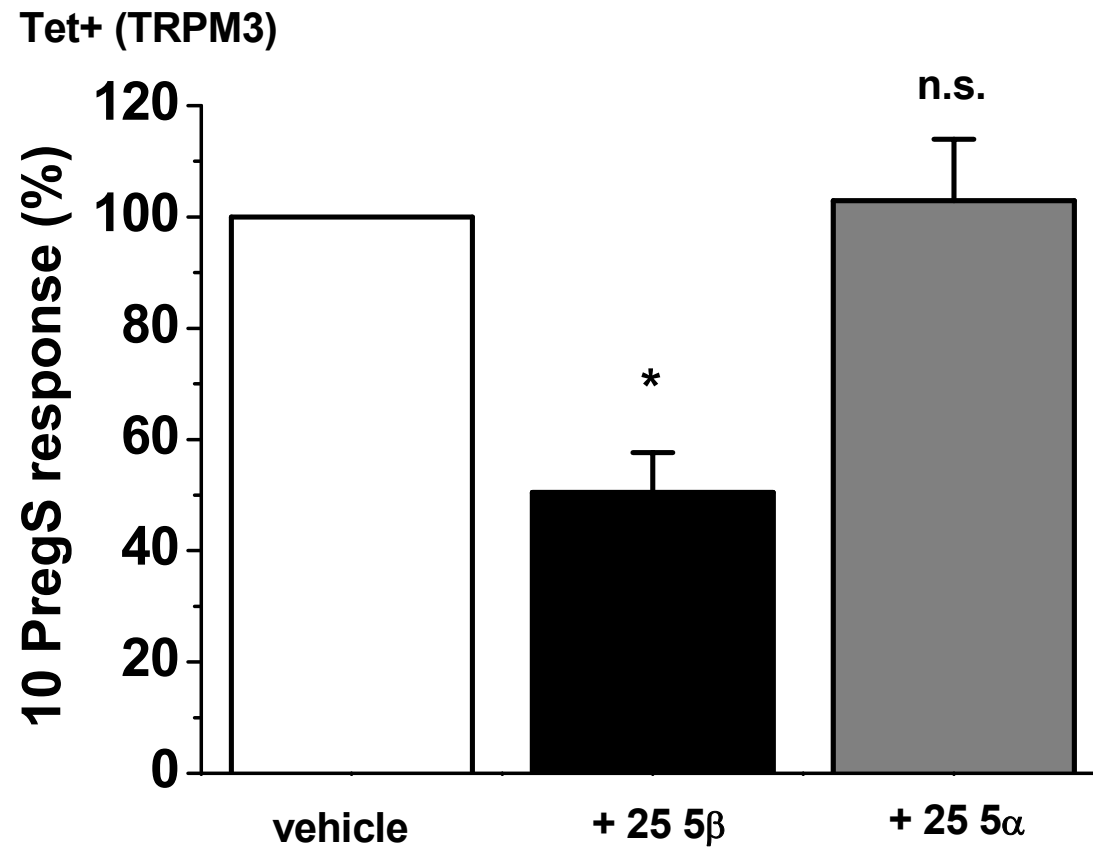

Supplementary figure II

17-OH progesterone

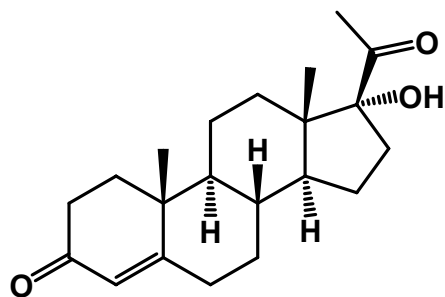

21-OH progesterone

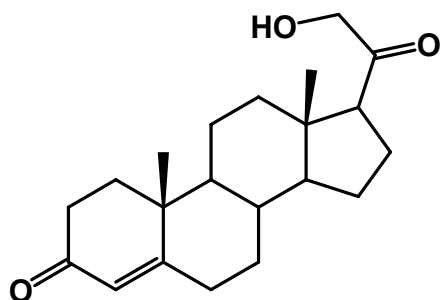

pregnanolone (5 $\beta$ )

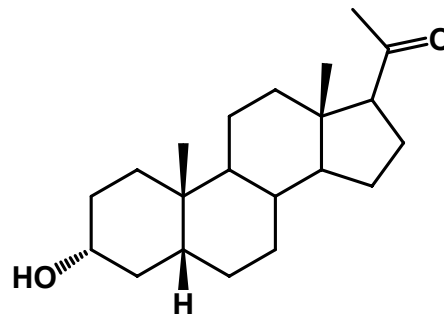

allopregnanolone (5 $\alpha$ )

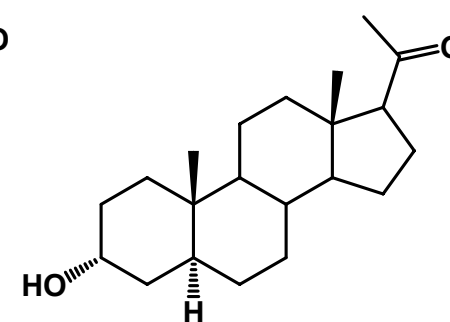

17 $\beta$ -oestradiol

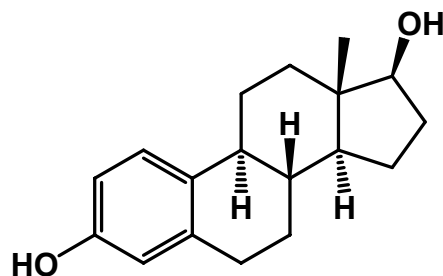

aldosterone

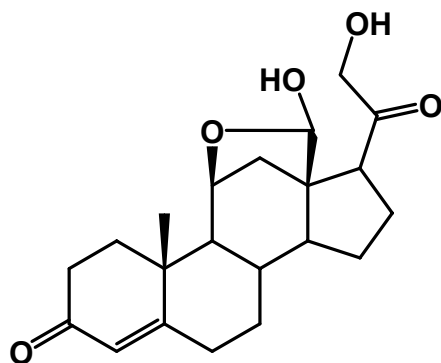

cortisol

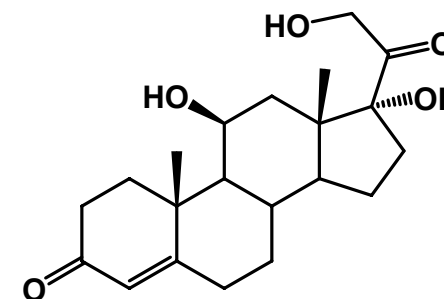

nifedipine

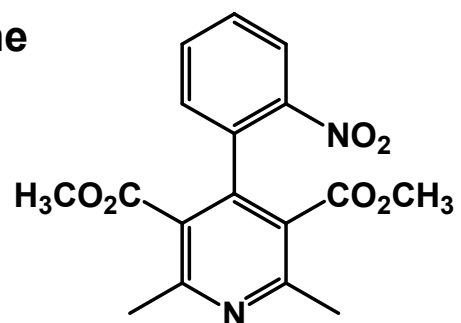

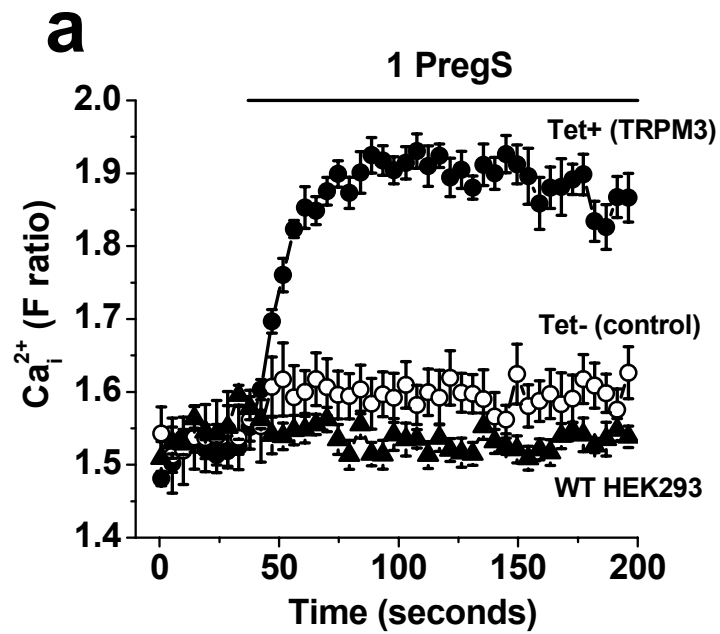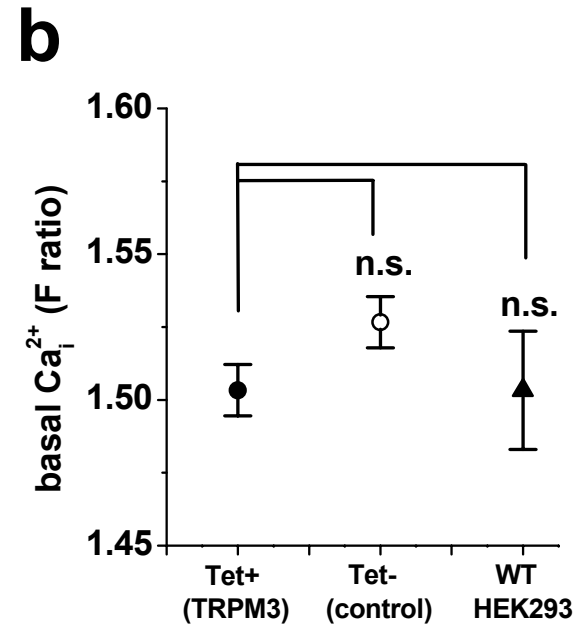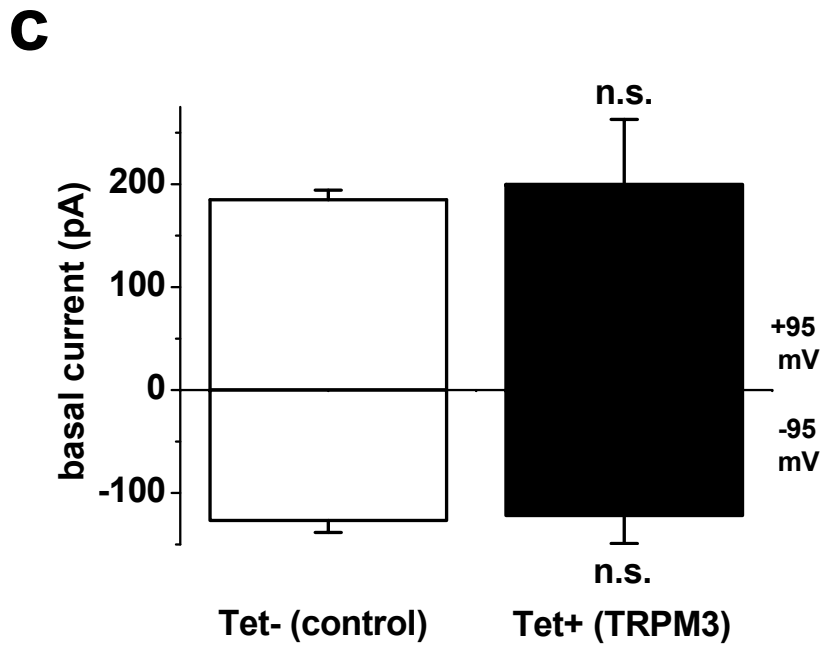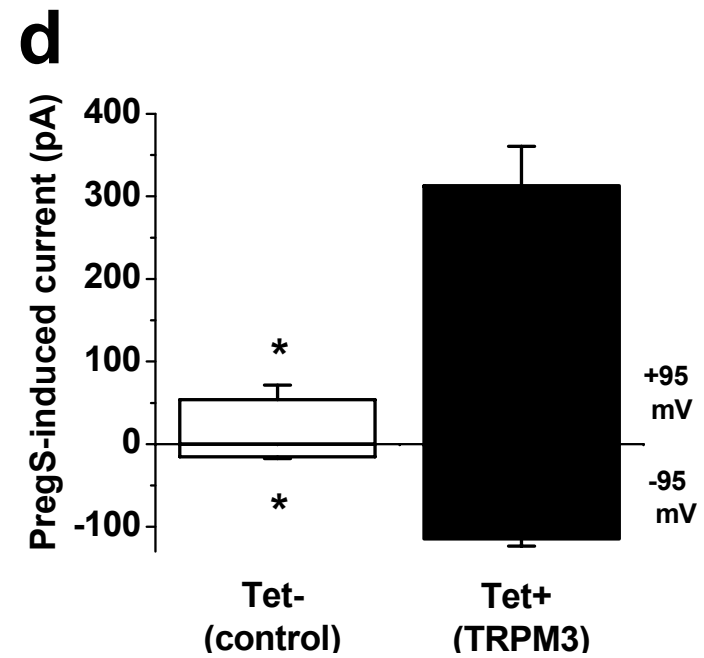

Supplementary figure IV

**a**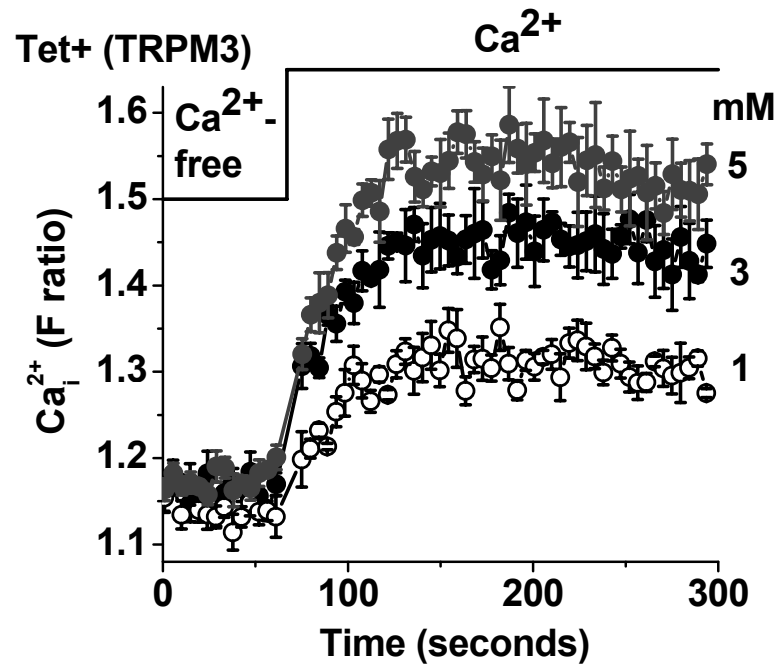**b**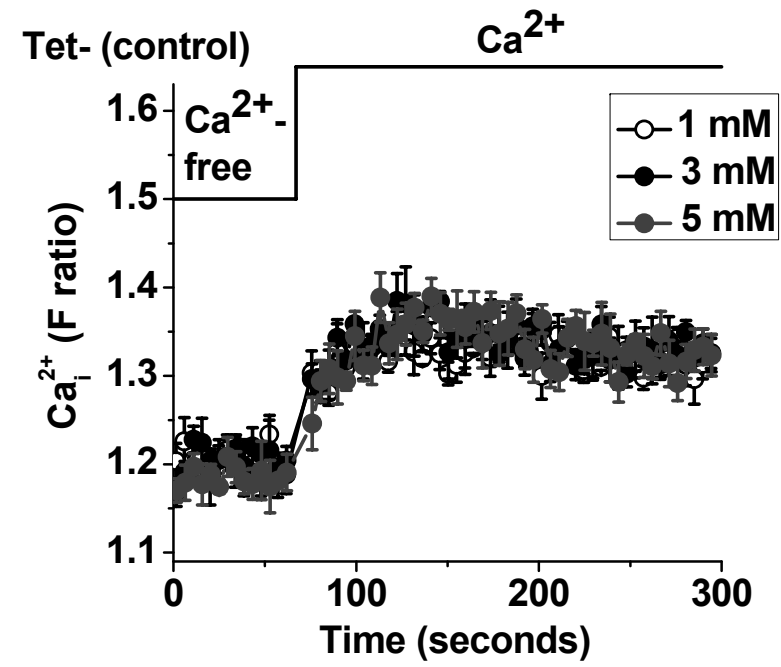

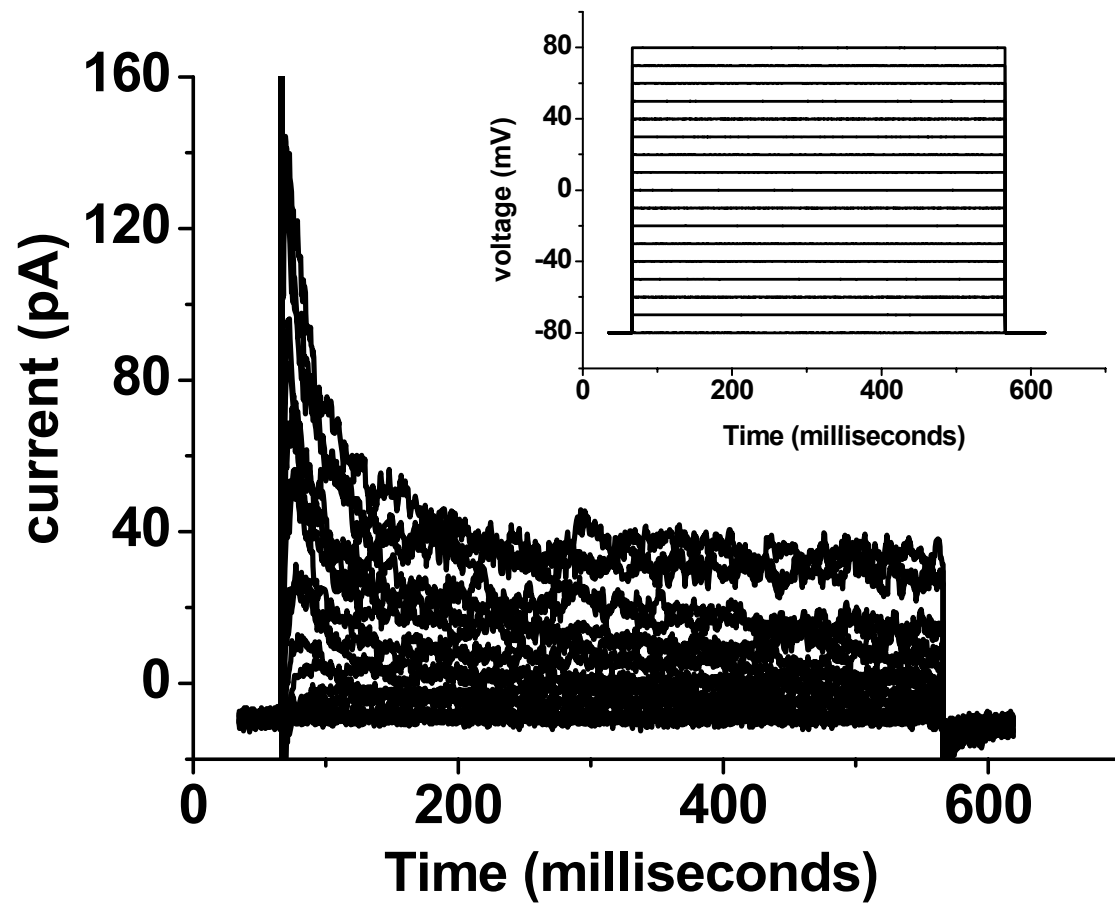

Supplementary figure VI



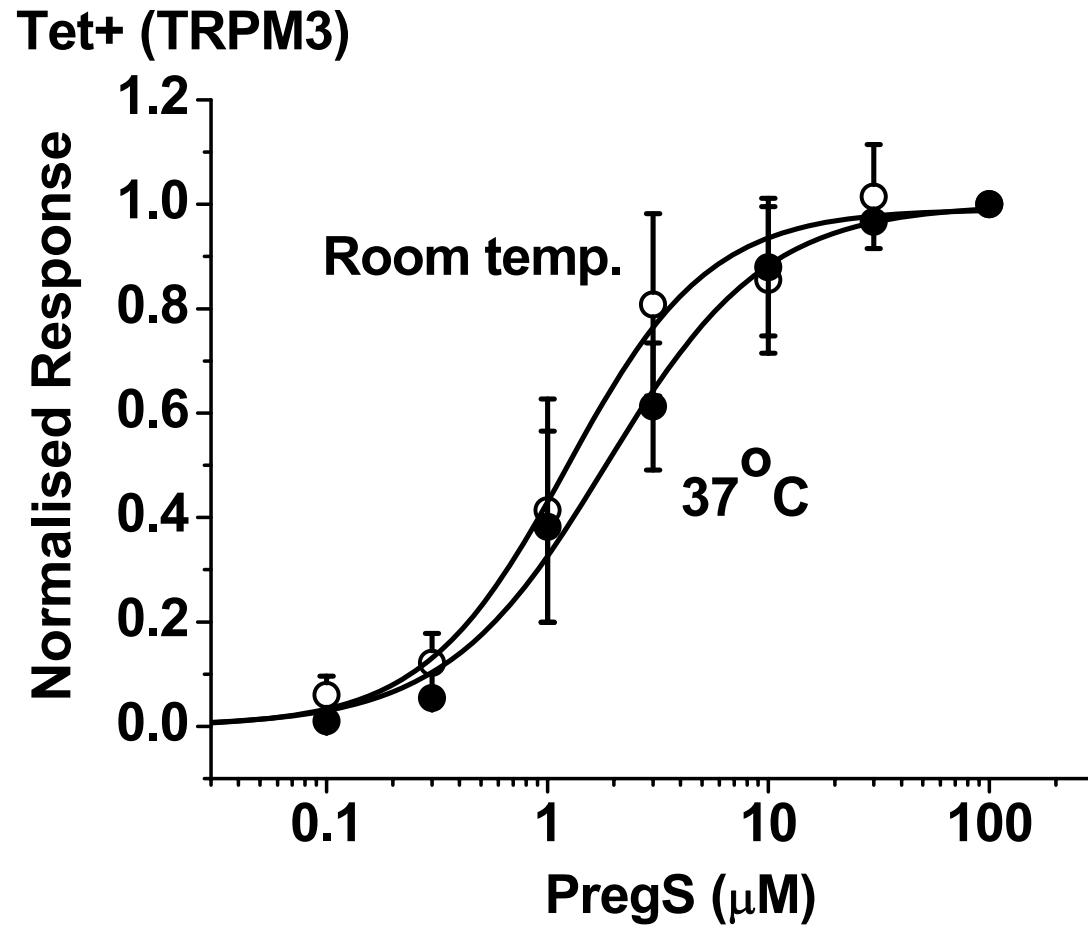

**Supplementary figure VII**
